# Supplementary material for: Room Temperature Nanographene Production via CO2 Electrochemical Reduction on the Electrodeposited Bi on Sn Substrate
Source: Nanomaterials (Basel). 2022 Sep 28;12(19):3389. doi: 10.3390/nano12193389 (PMC9565334; doi:10.3390/nano12193389)
Supplement: Supplementary file 1 [file nanomaterials-12-03389-s001.zip › nanomaterials-1926053-supplementary.pdf]

# Room Temperature Nanographene Production via CO<sub>2</sub> Electrochemical Reduction on the Electrodeposited Bi on Sn Substrate

Piriya Pinthong <sup>1</sup>, Sarita Phupaichitkun <sup>1</sup>, Suthasinee Watmanee <sup>1</sup>, Rungkiat Nganglumpoon <sup>1,2</sup>, Duangamol N. Tungasmita <sup>3</sup>, Sukkaneste Tungasmita <sup>2,4</sup>, Yuttanant Boonyongmaneerat <sup>5</sup>, Nadtinan Promphet <sup>5</sup>, Nadnudda Rodthongkum <sup>5</sup>, and Joongjai Panpranot <sup>1,2,6,\*</sup>

<sup>1</sup> Center of Excellence on Catalysis and Catalytic Reaction Engineering, Department of Chemical Engineering, Faculty of Engineering, Chulalongkorn University, Bangkok 10330, Thailand

<sup>2</sup> Graphene Electronics Research Unit, Faculty of Science, Chulalongkorn University, Bangkok 10330, Thailand

<sup>3</sup> Department of Chemistry, Faculty of Science, Chulalongkorn University, Bangkok 10330, Thailand

<sup>4</sup> Department of Physics, Faculty of Science, Chulalongkorn University, Bangkok 10330, Thailand.

<sup>5</sup> Metallurgy and Materials Science Research Institute (MMRI), Chulalongkorn University, Bangkok 10330, Thailand

<sup>6</sup> Bio-Circular-Green-economy Technology & Engineering Center, BCGeTEC, Department of Chemical Engineering, Faculty of Engineering, Chulalongkorn University, Bangkok 10330, Thailand

\* Correspondence: joongjai.p@chula.ac.th

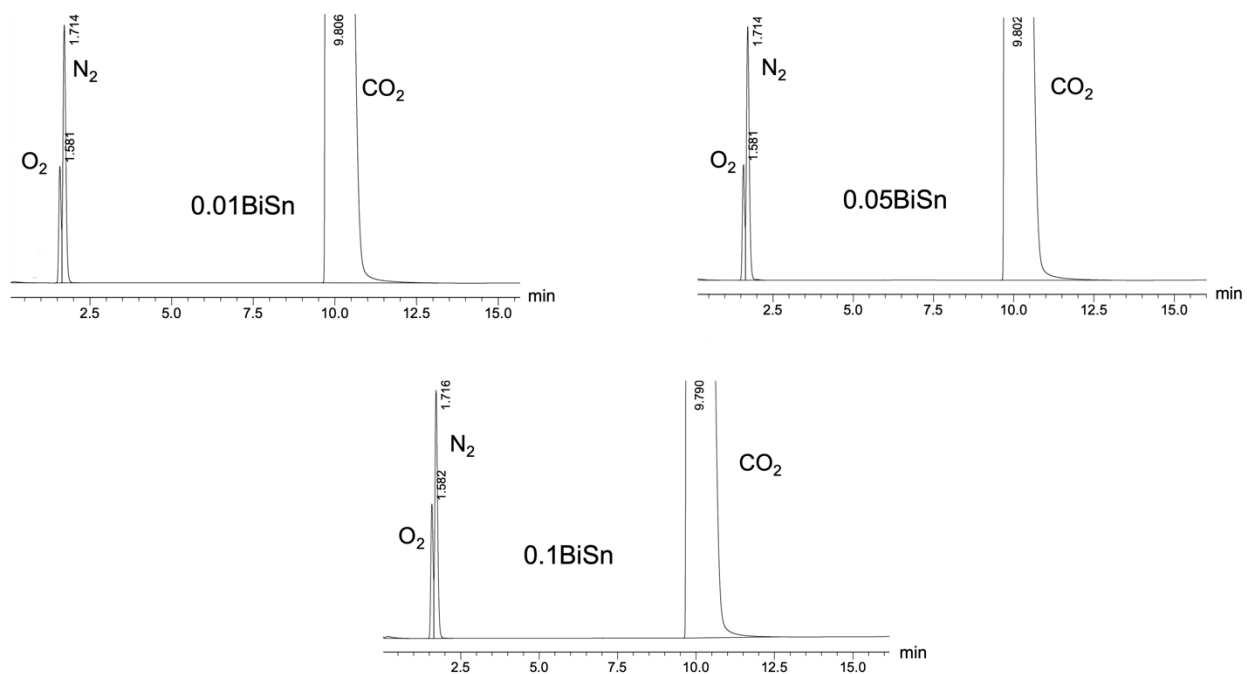

**Figure S1** GC-TCD results of 0.01Bi/Sn, 0.05Bi/Sn, and 0.1Bi/Sn after  $CO_2RR$  at -1.1 V vs. Ag/AgCl for 70 min

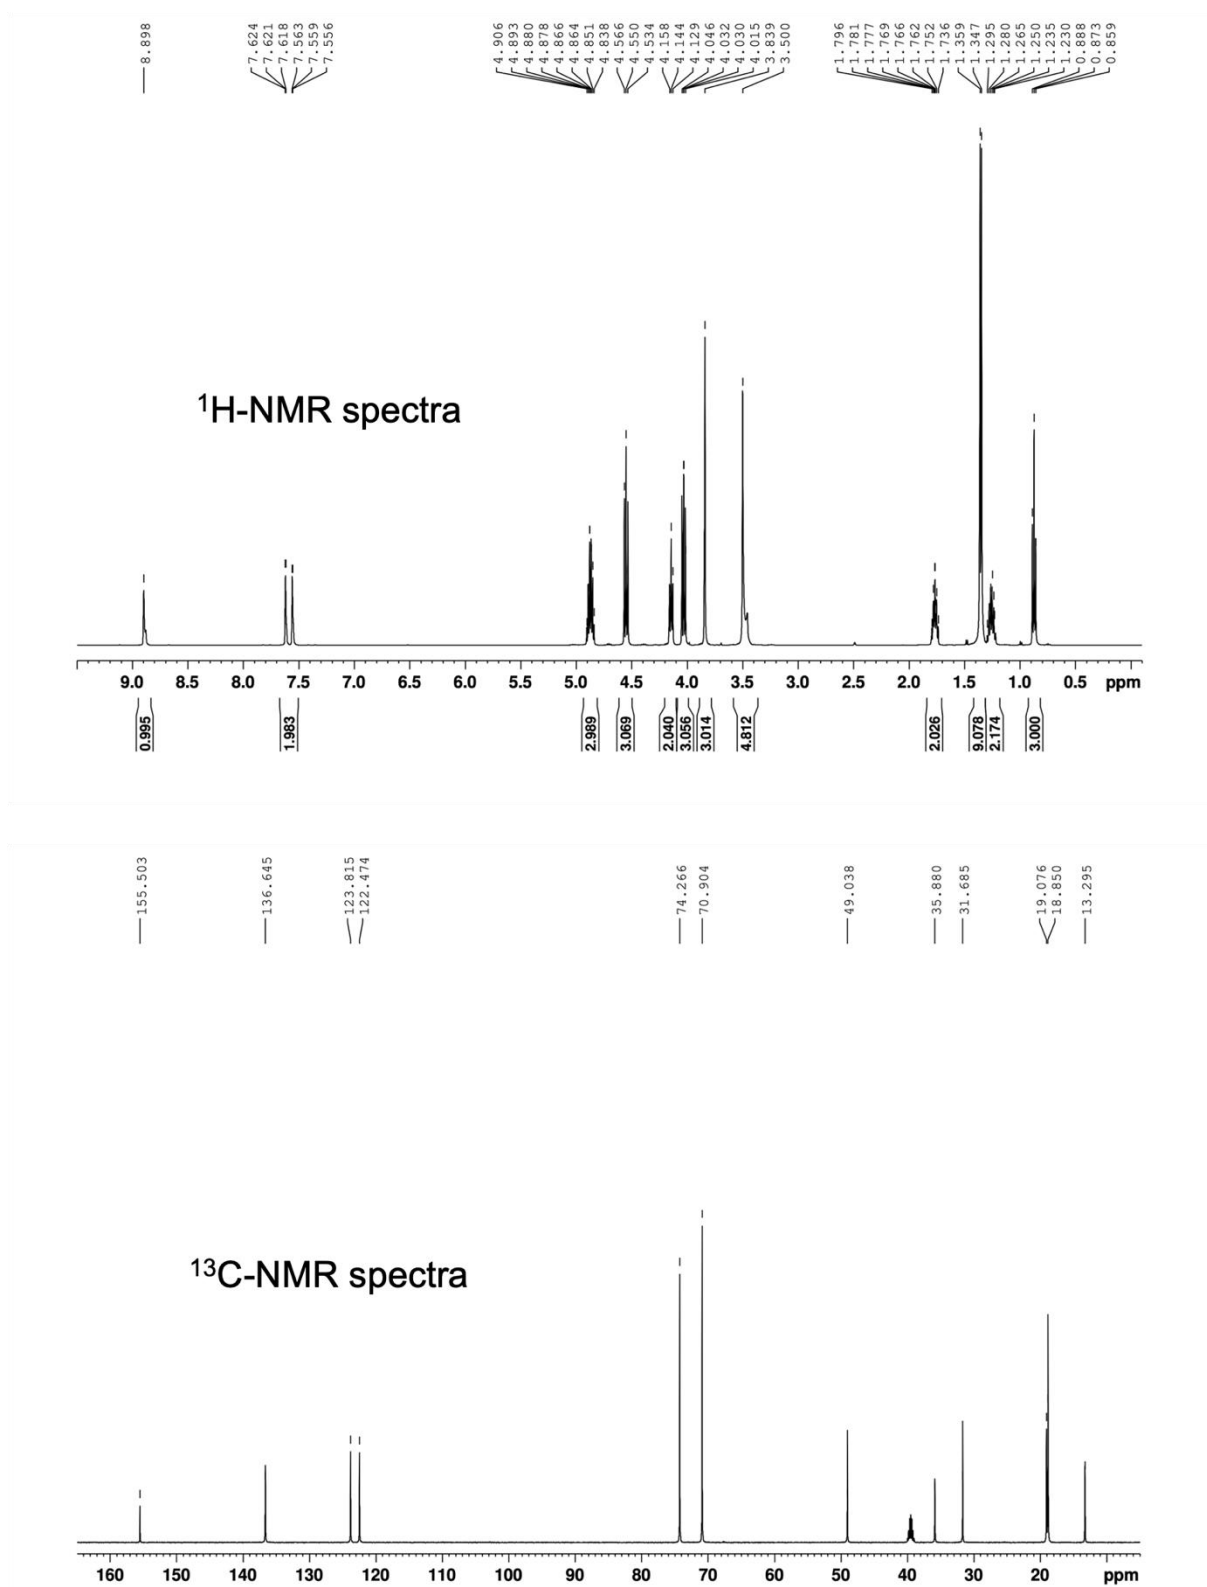

**Figure S2** NMR spectra of catholyte results of 0.01Bi/Sn after  $\text{CO}_2\text{RR}$  at -1.1 V vs. Ag/AgCl for 70 min

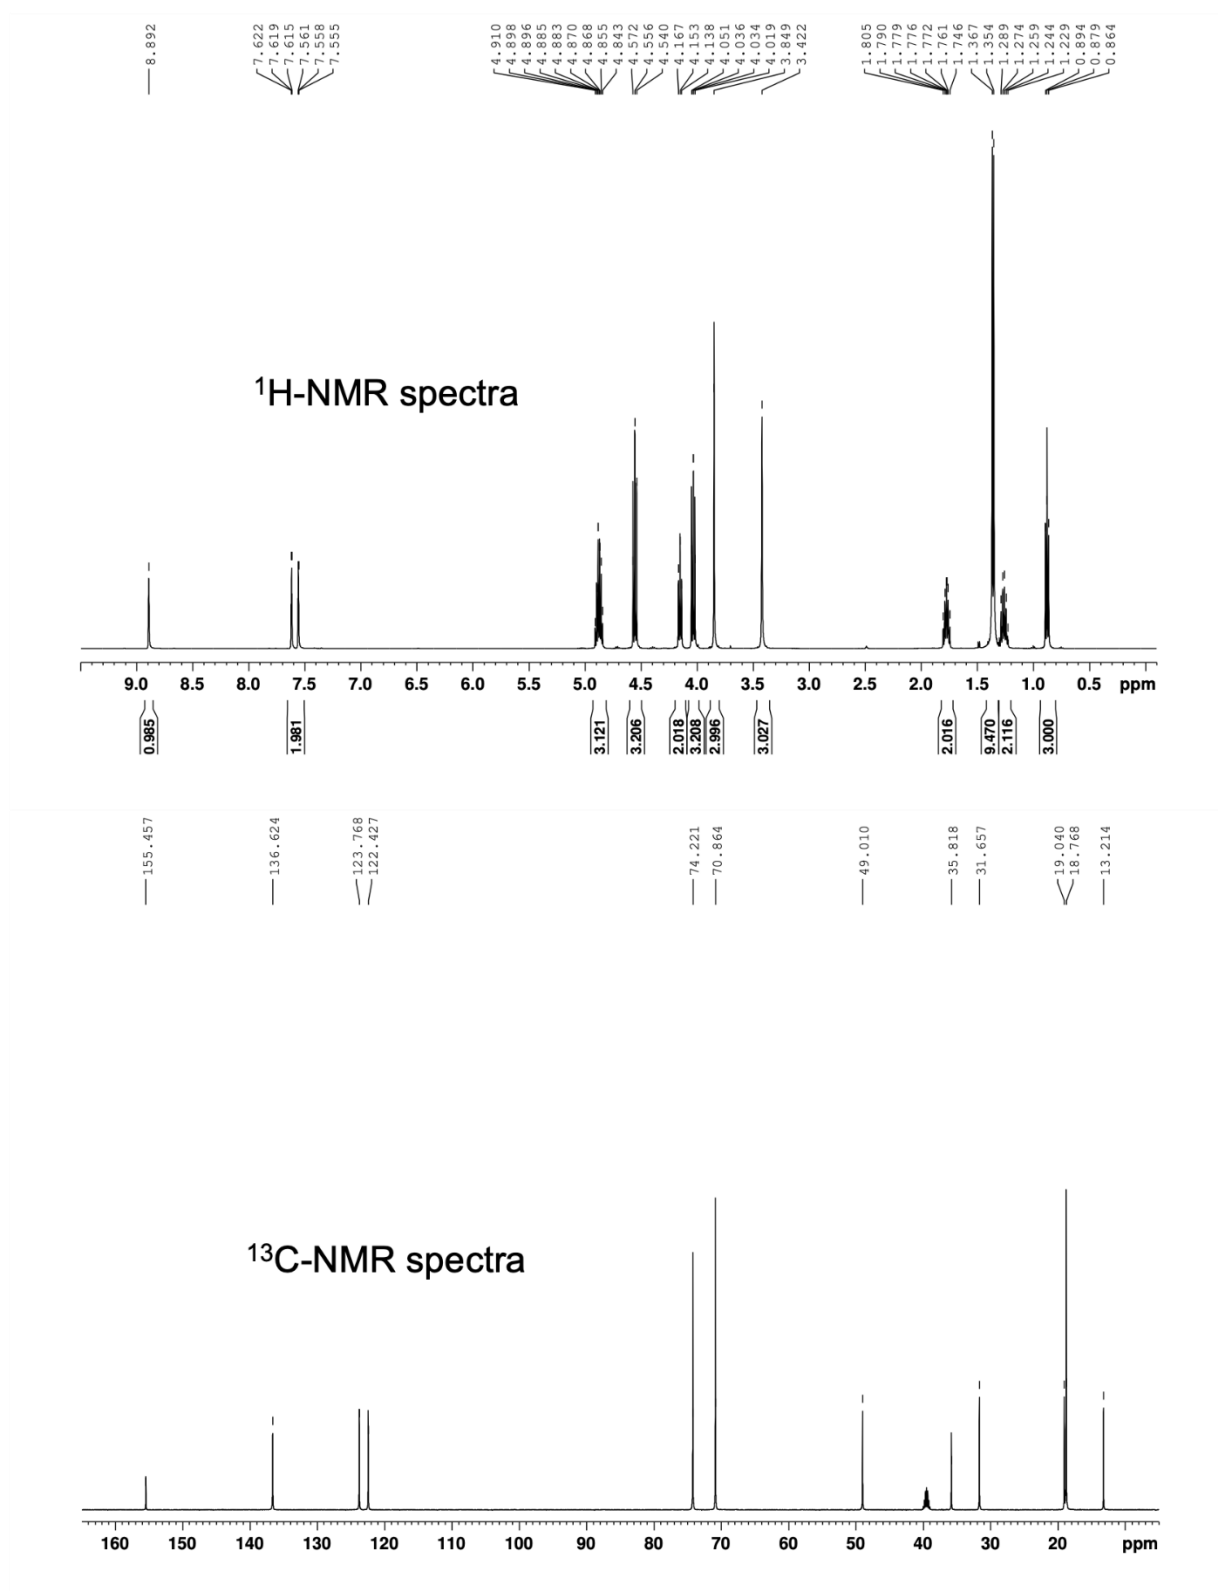

Figure S3 NMR spectra of catholyte results of 0.05Bi/Sn after CO<sub>2</sub>RR at -1.1 V vs. Ag/AgCl for 70 min

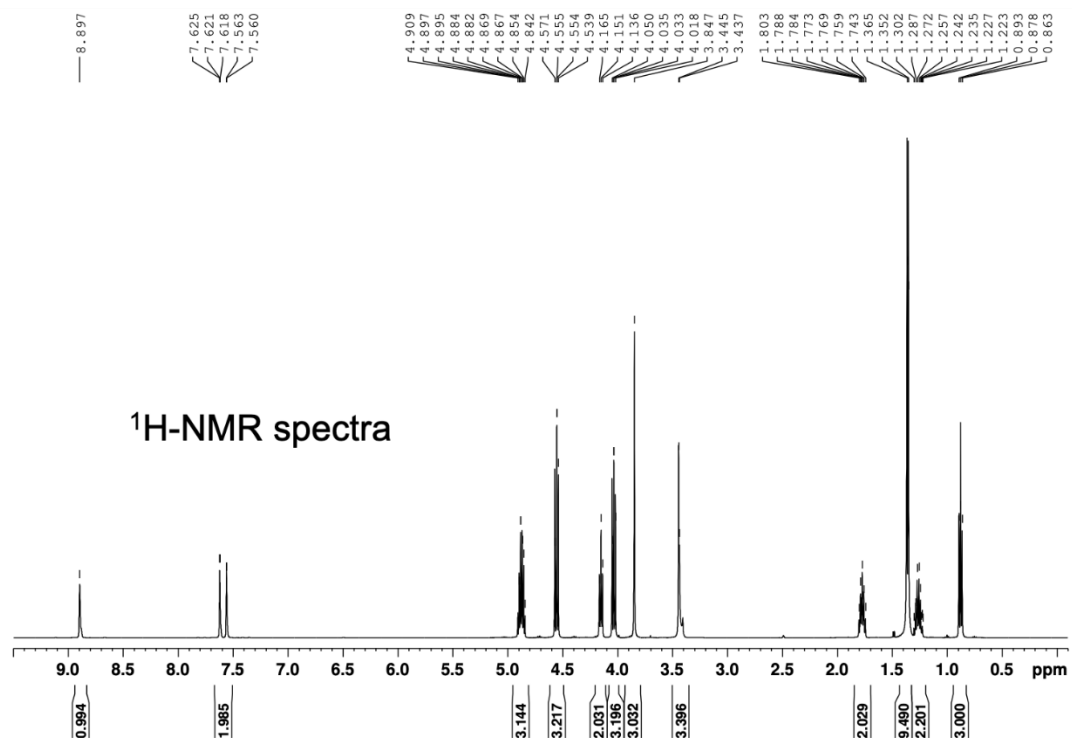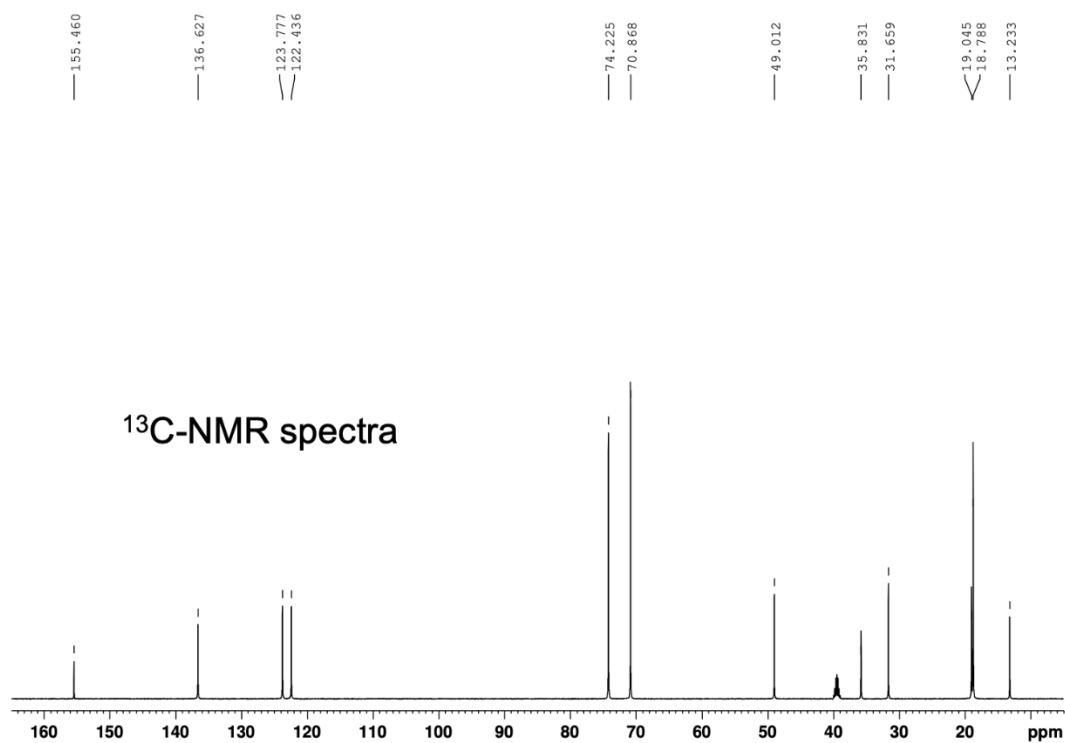

Figure S4 NMR spectra of catholyte results of 0.1Bi/Sn after CO<sub>2</sub>RR at -1.1 V vs. Ag/AgCl for 70 min

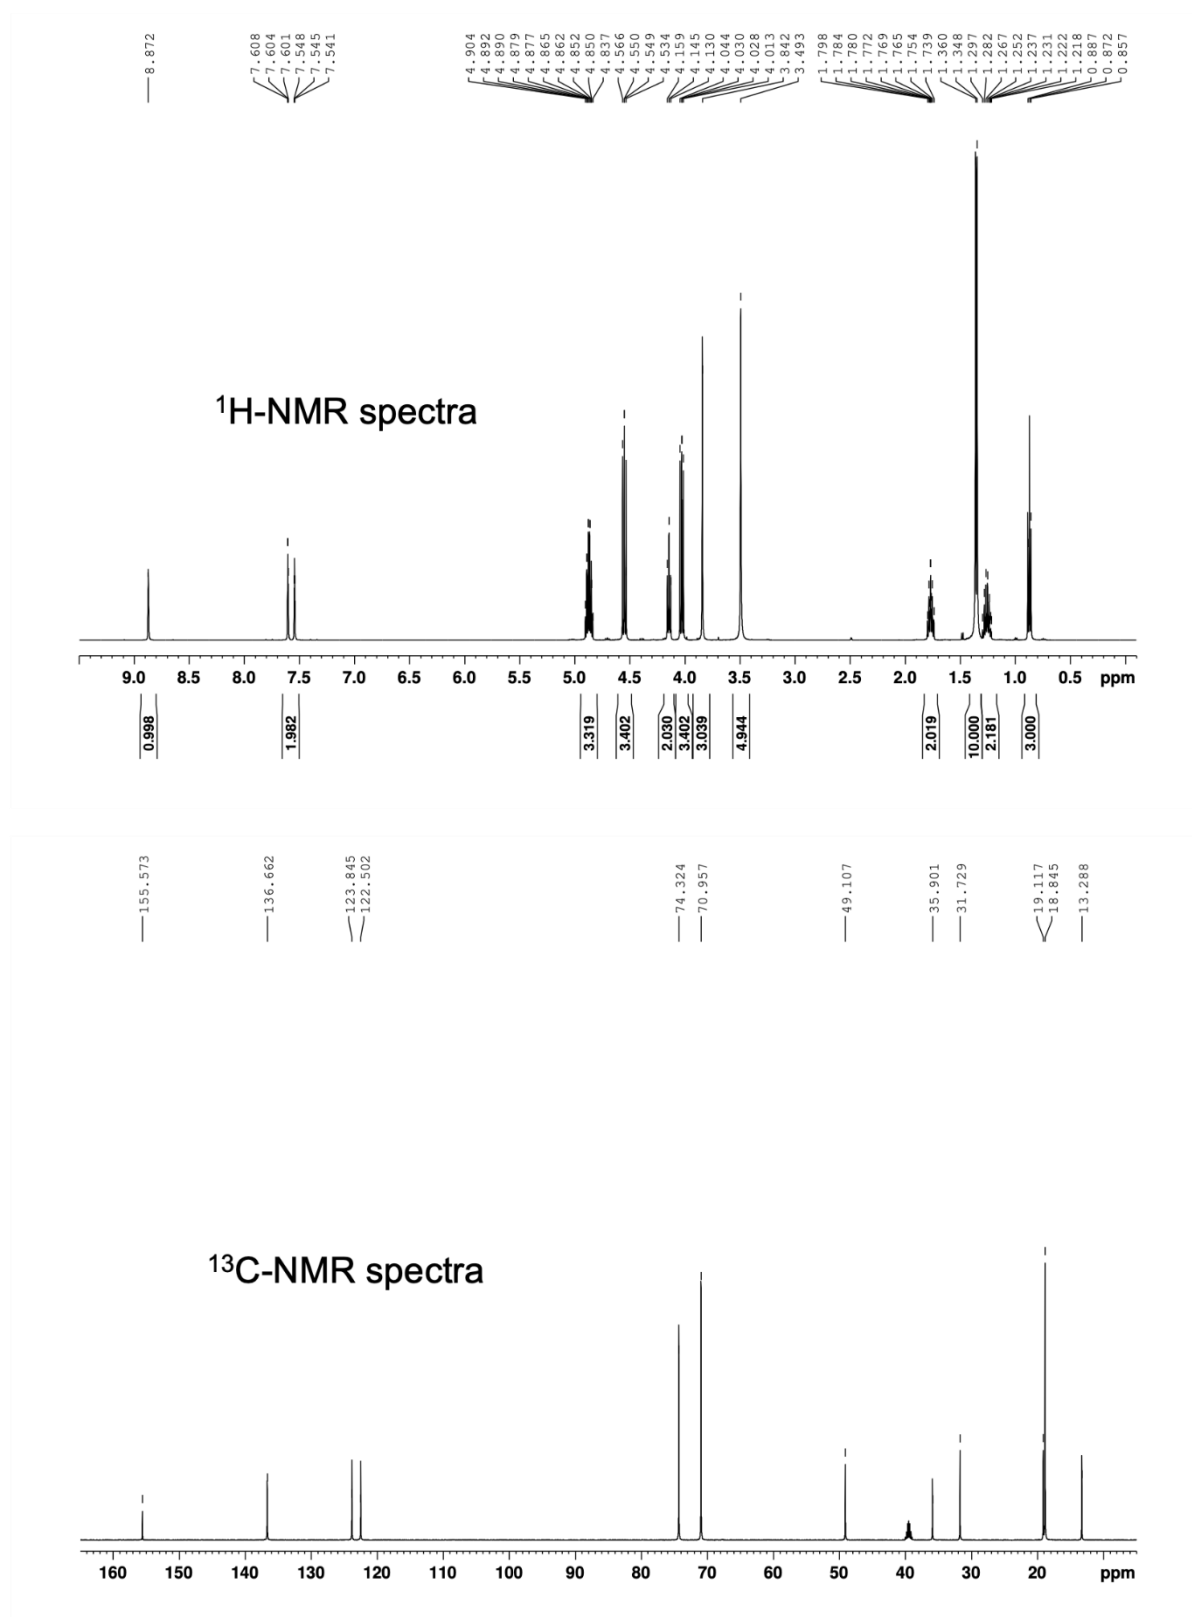

Figure S5 NMR spectra of catholyte results of 0.05Bi/Sn after CO<sub>2</sub>RR at -1.3 V vs. Ag/AgCl for 70 min

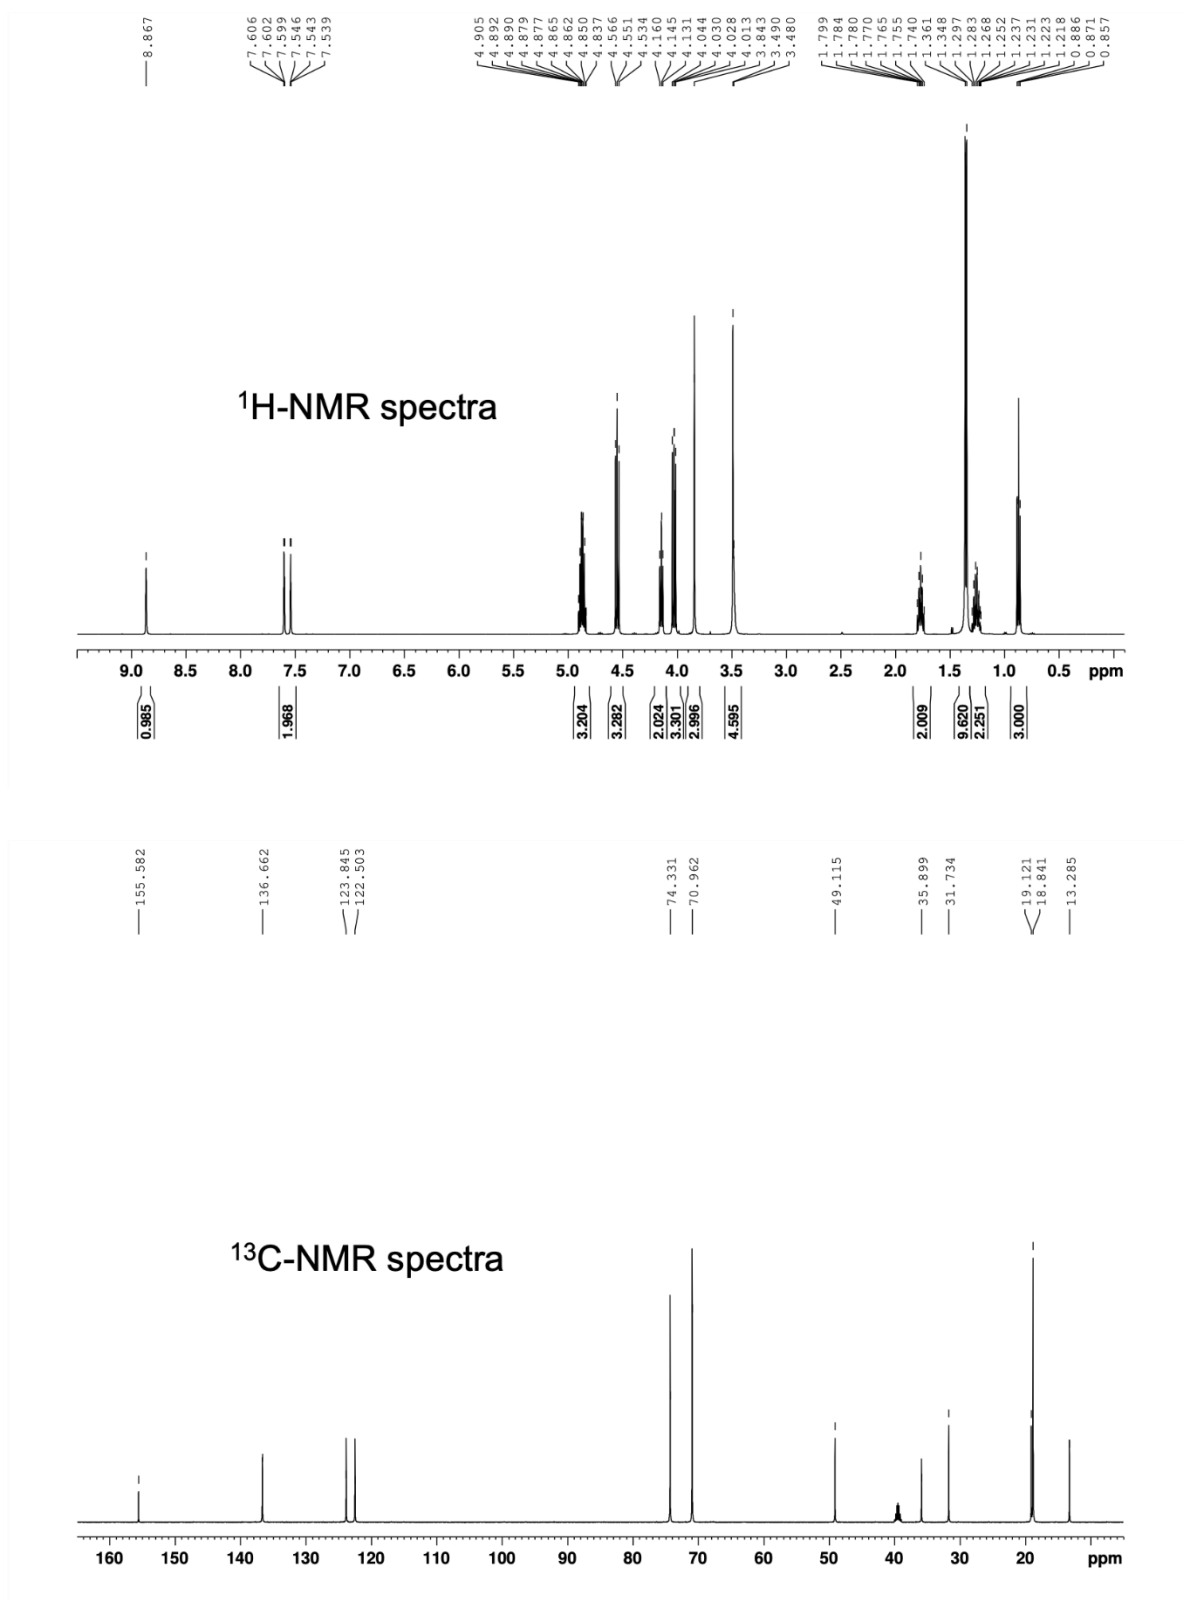

**Figure S6** NMR spectra of catholyte results of 0.05Bi/Sn after  $\text{CO}_2\text{RR}$  at -1.5 V vs. Ag/AgCl for 70 min

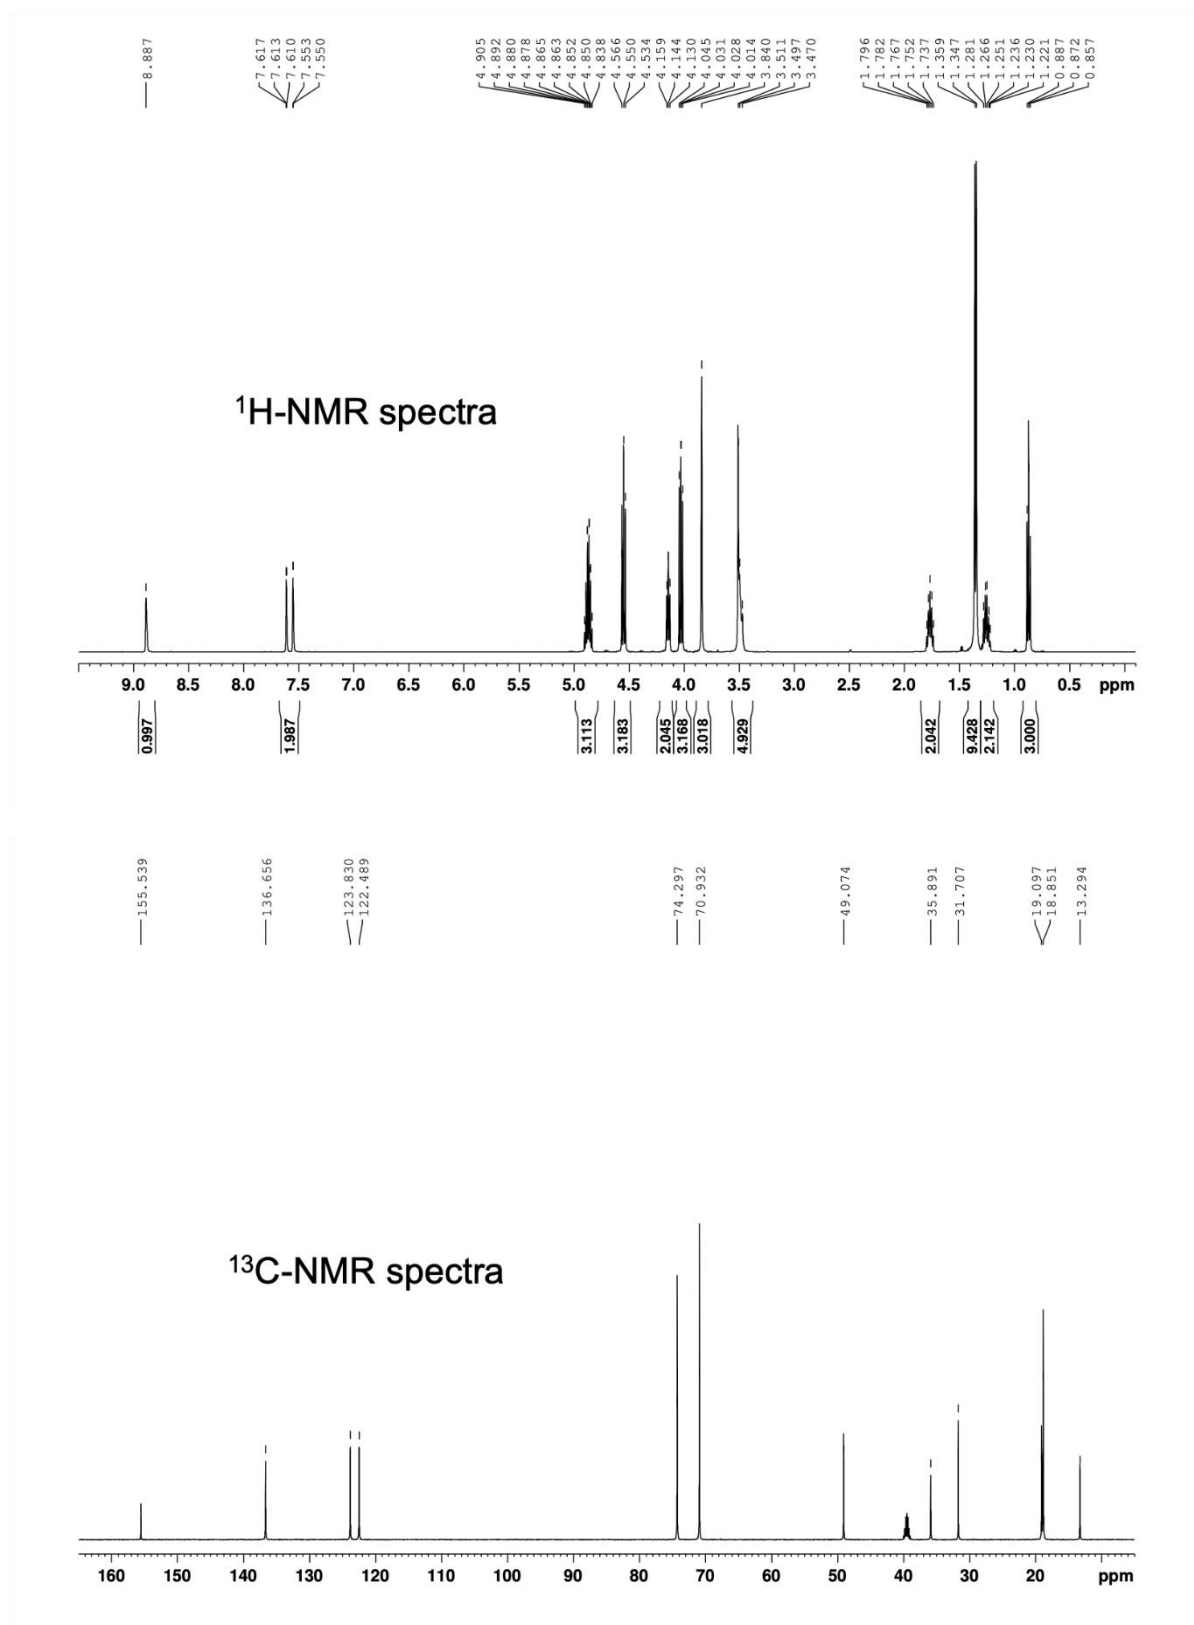

Figure S7 NMR spectra of catholyte results of 0.05Bi/Sn after CO<sub>2</sub>RR at -1.7 V vs. Ag/AgCl for 70 min

(i) Analysis of  $^1\text{H}$ -NMR spectra of cathodic electrolytes  $[\text{BMIM}]^+[\text{BF}_4]^-$  and propylene carbonate before  $\text{CO}_2\text{RR}$

| Compounds                                        | Molecular Structure                                                                 | Chemical Shift ( $\delta$ ppm)  |                                 |
|--------------------------------------------------|-------------------------------------------------------------------------------------|---------------------------------|---------------------------------|
|                                                  |                                                                                     | Before Reaction<br>(0 mins)     | After Reaction<br>(70 mins)     |
| Propylene carbonate                              | 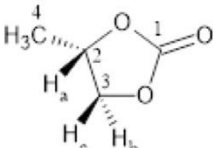   | (H2a, 1H, t)<br>4.88            | (H2a, 1H, t)<br>4.84            |
|                                                  |                                                                                     | (H3b, 1H, dd)<br>4.54, $J=8$ Hz | (H3b, 1H, dd)<br>4.52, $J=8$ Hz |
|                                                  |                                                                                     | (H3c, 1H, dd)<br>4.04, $J=8$ Hz | (H3c, 1H, dd)<br>4.01, $J=8$ Hz |
|                                                  |                                                                                     | (H4, 3H, s) 1.38                | (H4, 3H, s) 1.35                |
| 1-Butyl-3-methylimidazolium<br>tetrafluoroborate | 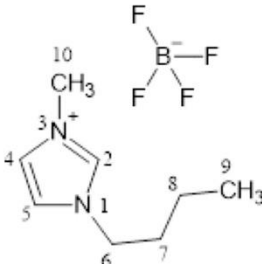 | (H2, 1H, t) 8.96                | (H2, 1H, t) 8.76                |
|                                                  |                                                                                     | (H5, 1H, t) 7.68                | (H5, 1H, t) 7.53                |
|                                                  |                                                                                     | (H4, 1H, t) 7.61                | (H4, 1H, t) 7.50                |
|                                                  |                                                                                     | (H6, 2H, t) 4.14                | (H6, 2H, t) 4.09                |
|                                                  |                                                                                     | (H7, 2H, m)<br>1.72             | (H7, 2H, m)<br>1.72             |
|                                                  |                                                                                     | (H8, 2H, m)<br>1.24             | (H8, 2H, m)<br>1.29             |
|                                                  |                                                                                     | (H9, 3H, t) 0.87                | (H9, 3H, t) 0.83                |
|                                                  |                                                                                     | (H10, 3H, s)<br>3.84            | (H10, 3H, s)<br>3.84            |

(ii) Analysis of  $^{13}\text{C}$ -NMR spectra of cathodic electrolytes  $[\text{BMIM}]^+[\text{BF}_4]^-$  and propylene carbonate before  $\text{CO}_2\text{RR}$

| Compounds                                        | Molecular Structure                                                                | Chemical Shift (ppm)        |                             |
|--------------------------------------------------|------------------------------------------------------------------------------------|-----------------------------|-----------------------------|
|                                                  |                                                                                    | Before Reaction<br>(0 mins) | After Reaction<br>(70 mins) |
| Propylene carbonate                              | 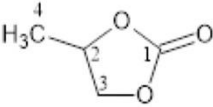  | (C1) 155.37                 | (C1) 155.64                 |
|                                                  |                                                                                    | (C2) 74.16                  | (C2) 74.33                  |
|                                                  |                                                                                    | (C3) 70.88                  | (C3) 70.91                  |
|                                                  |                                                                                    | (C4) 18.95                  | (C4) 18.80                  |
| 1-Butyl-3-methylimidazolium<br>tetrafluoroborate | 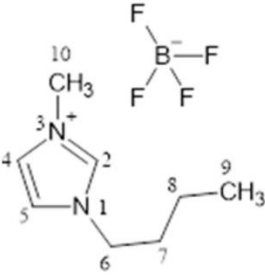 | (C2) 136.80                 | (C2) 136.60                 |
|                                                  |                                                                                    | (C4) 122.52                 | (C4) 122.30                 |
|                                                  |                                                                                    | (C5) 123.84                 | (C5) 123.66                 |
|                                                  |                                                                                    | (C6) 48.96                  | (C6) 49.09                  |
|                                                  |                                                                                    | (C7) 31.73                  | (C7) 31.61                  |
|                                                  |                                                                                    | (C8) 19.28                  | (C8) 19.07                  |
|                                                  |                                                                                    | (C9) 13.43                  | (C9) 13.24                  |
|                                                  |                                                                                    | (C10) 35.92                 | (C10) 35.70                 |

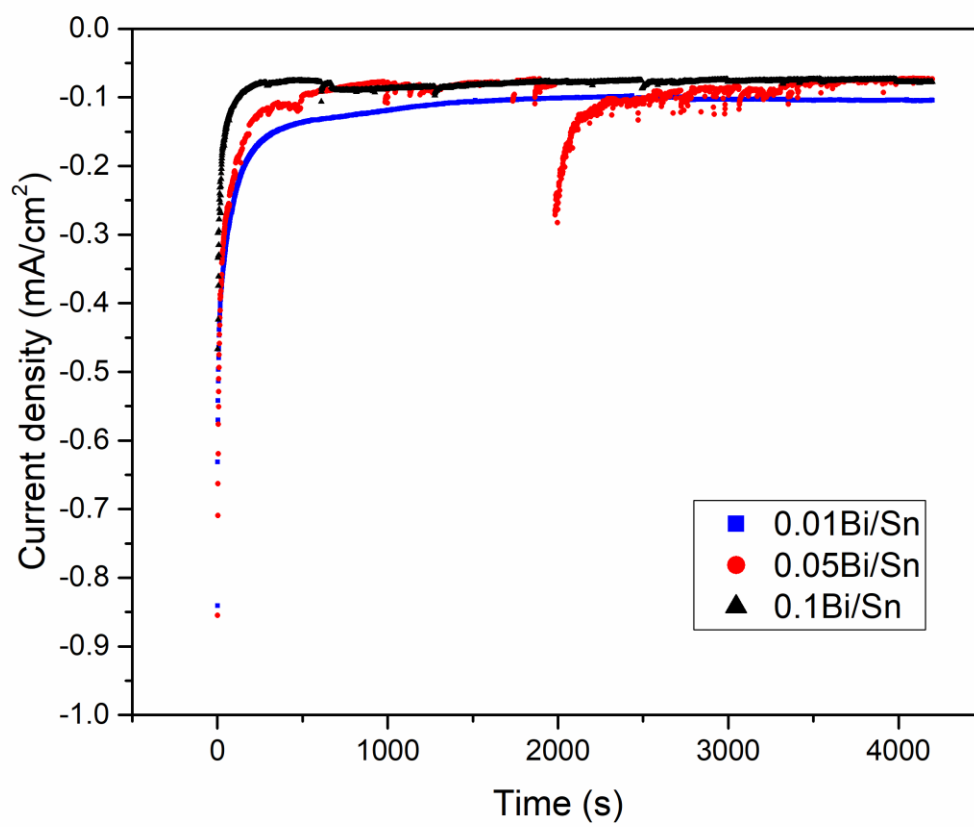

**Figure S8** Current density of Bi/Sn during CO<sub>2</sub>RR at -1.1 V vs. Ag/AgCl for 70 min

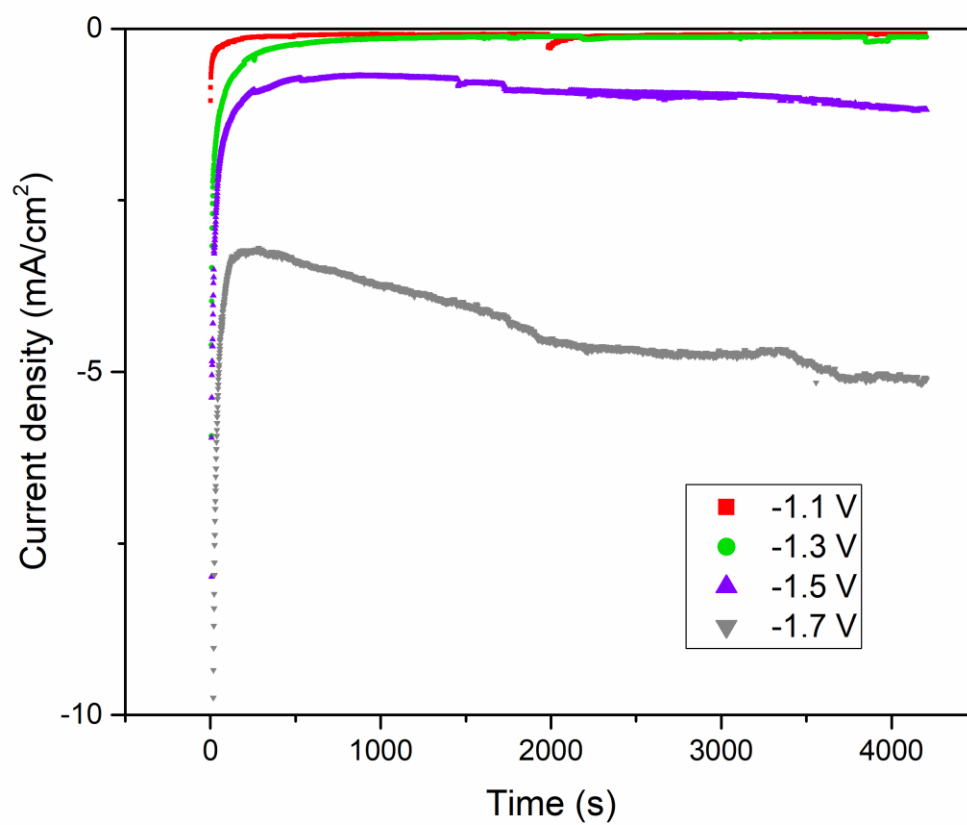

**Figure S9** Current density of 0.05Bi/Sn during CO<sub>2</sub>RR at various applied potentials vs. Ag/AgCl for 70 min
